# Supplementary material
Source: Springer Nature journal article supplement (https://www.springermedizin.de/resource/supplementary/12979_2008_55_MOESM4_ESM.pdf/9603262)
Supplement: MOESM4 [file 9603262]

Antigen

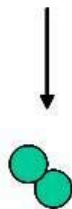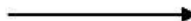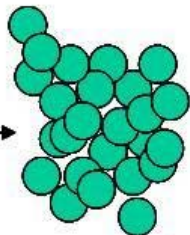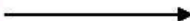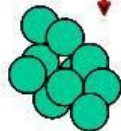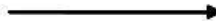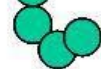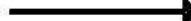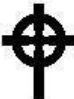

**Compromised  
in the elderly**

*Dysfunctional cells*

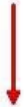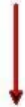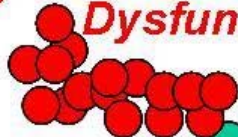

Apoptosis

Contraction

Cytokines (eg. IL-15)

Memory

Expansion  
(ca. 28 PD  
in IM and cancer  
vaccination)

Activation of  
naive cells
